# Supplementary material for: Facile synthesis of nitrogen-doped carbon–Pt nanoparticle hybrids via carbonization of poly([Bvim][Br]-co-acrylonitrile) for electrocatalytic oxidation of methanol
Source: Royal Society of Chemistry journal article supplement (doi:10.1039/c2jm31973j), 2012-01-01
Supplement: c2jm31973j.pdf [file c2jm31973j.pdf]

Supplementary Material (ESI) for Journal of Materials Chemistry

This journal is © The Royal Society of Chemistry 2012

***Electronic Supplementary Information (ESI) for***

Facile Synthesis of Nitrogen-doped Carbon/Pt Nanoparticle Hybrids via  
Carbonization of Poly(1-butyl-3-vinylimidazolium bromide-co-acrylonitrile)  
for Electrocatalytic Oxidation of Methanol

Congtao Pan, Lihua Qiu, Yingjing Peng, and Feng Yan\*

Jiangsu Key Laboratory of Advanced Functional Polymer Design and Application, Department of  
Polymer Science and Engineering, College of Chemistry, Chemical Engineering and Materials Science,  
Soochow University, Suzhou, 215123, China.

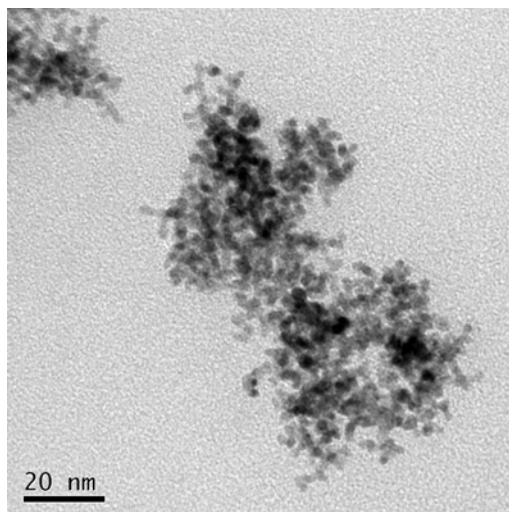

**Figure S1.** TEM images of synthesized Pt NPs. Reaction conditions: 1.0 mL  $\text{H}_2\text{PtCl}_6$  (30 mM), 4.5 mL  $\text{NaBH}_4$  (40 mM), 25 mg PVP and 18 mL water.

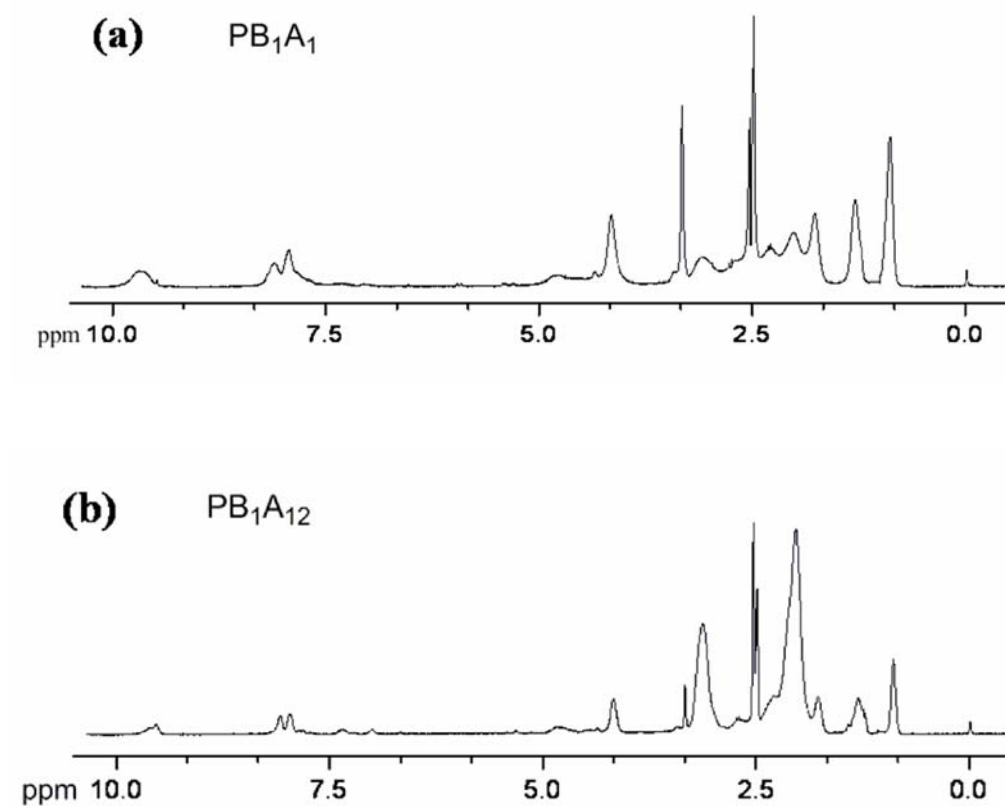

**Figure S2.**  $^1\text{H}$ -NMR spectra for (a)  $\text{PB}_1\text{A}_1$ , (b)  $\text{PB}_1\text{A}_{12}$ .

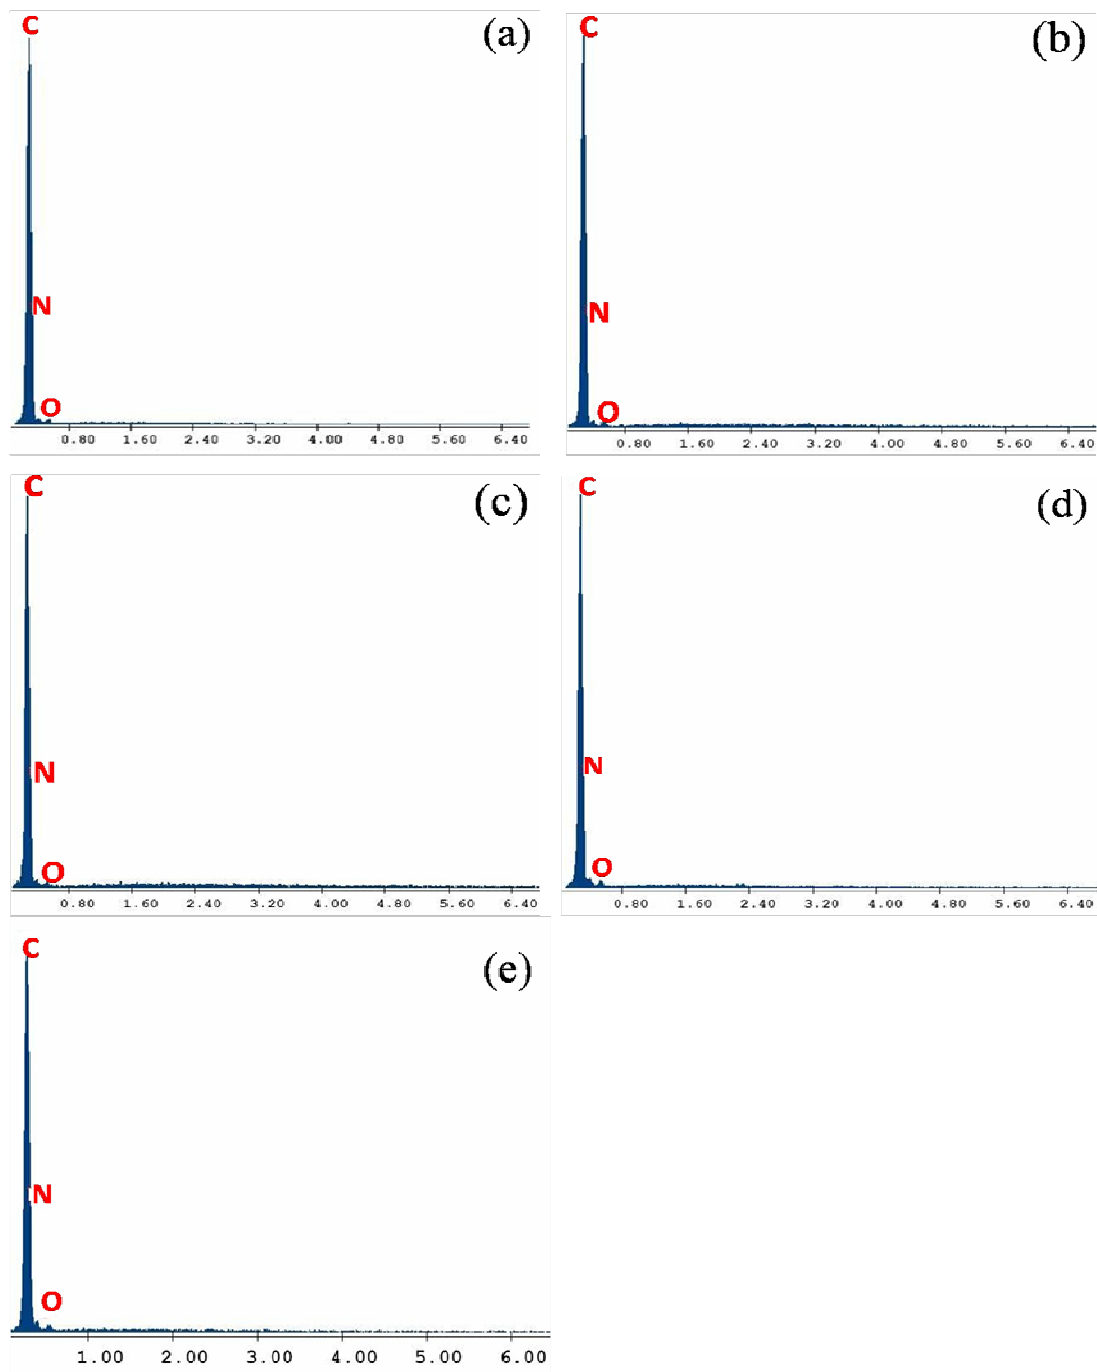

**Figure S3.** EDS of N-doped carbon materials derived from (a) PILs, (b) PB<sub>1</sub>A<sub>1</sub>, (c) PB<sub>1</sub>A<sub>4</sub>, (d) PB<sub>1</sub>A<sub>12</sub> and (e) PAN. (Conditions: ramp rate = 10 °C min<sup>-1</sup>, temperature = 800 °C, dwell time = 1 h).

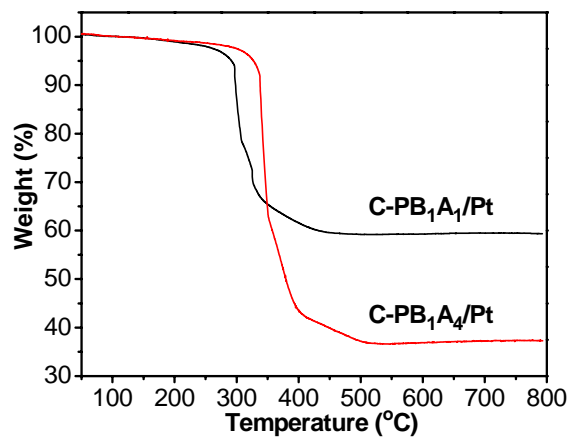

**Figure S4.** TGA curves to determine Pt loading in the two Pt loaded carbon samples.

The Pt loading was determined by TGA of samples under air atmosphere. As shown in [Figure S4](#) that about 59.0 and 39.6 wt% Pt nanoparticles were loaded in the sample of C-PB<sub>1</sub>A<sub>1</sub>/Pt and C-PB<sub>1</sub>A<sub>4</sub>/Pt, respectively.

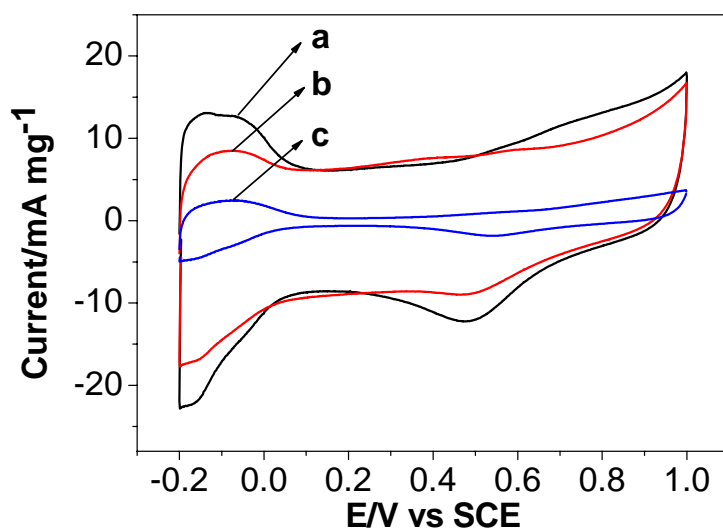

**Figure S5.** CVs of nitrogen-doped C/Pt nanohybrids and pure Pt NPs modified electrodes in N<sub>2</sub>-saturated 0.5 M H<sub>2</sub>SO<sub>4</sub> solution at a scan rate of 50 mV s<sup>-1</sup>, a) C-PB<sub>1</sub>A<sub>1</sub>/Pt, b) C-PB<sub>1</sub>A<sub>4</sub>/Pt, c) pure Pt NPs.

The ECSA value can be measured by integrating Coulombic charge for hydrogen adsorption-desorption from the cyclic voltammograms shown in Figure S5 according to the following equation:<sup>1,2</sup>

$$ECSA = \frac{Q_H}{0.21 \times L_{Pt}}$$

where  $Q_H$  ( $\text{mC}\cdot\text{cm}^{-2}$ ) represents the mean value between the amounts of charge exchanged during the electro-adsorption and desorption of  $\text{H}_2$  on Pt sites,  $L_{Pt}$  is the Pt loading ( $\text{mg}/\text{cm}^2$ ) on the GC electrode ( $0.0707 \text{ cm}^2$  in geometric area) and  $0.21$  ( $\text{mC}\cdot\text{cm}^{-2}$ ) represents the charge required to oxidize a monolayer of  $\text{H}_2$  on Pt. The loading mass of Pt nanoparticles on the GC of C-PB<sub>1</sub>A<sub>1</sub>/Pt, C-PB<sub>1</sub>A<sub>4</sub>/Pt was determined by thermogravimetric analysis (TGA). From Figure S5, the ECSA values of the two catalysts (C-PB<sub>1</sub>A<sub>1</sub>/Pt, C-PB<sub>1</sub>A<sub>4</sub>/Pt) were calculated and summarized in Table S1.

Table S1. Hydrogen adsorption and desorption charges and the electrochemical surface area (ECSA) of the two catalysts

| Catalysts                            | $L_{Pt}$ ( $\mu\text{g}\cdot\text{cm}^{-2}$ ) | $Q_H$ ( $\text{mC}\cdot\text{cm}^{-2}$ ) | ECSA [ $\text{m}^2/\text{g Pt}$ ] |
|--------------------------------------|-----------------------------------------------|------------------------------------------|-----------------------------------|
| C-PB <sub>1</sub> A <sub>1</sub> /Pt | 99.71                                         | 6.94                                     | 33.14                             |
| C-PB <sub>1</sub> A <sub>4</sub> /Pt | 66.93                                         | 3.53                                     | 25.10                             |

### Reference:

1. A. Pozio, M. De Francesco, A. Cemmi, F. Cardellini, L. Giorgi, *J. Power Sources*, 2002, **105**, 13-19.
2. E. P. Lee, Z.M. Peng, D. M. Cate, H. Yang, C. T. Campbell, and Y. N. Xia, *J. Am. Chem. Soc.*, 2007, **129**, 10634–10635.
